# Supplementary material for: Synergistic electrocatalysis of polysulfides by a nanostructured VS4-carbon nanofiber functional separator for high-performance lithium–sulfur batteries
Source: Royal Society of Chemistry journal article supplement (doi:10.1039/c9ta03516h), 2019-01-01
Supplement: c9ta03516h1.pdf [file c9ta03516h1.pdf]

## Supporting Information

### **Synergistic Electrocatalysis of Polysulfides by a Nanostructured VS<sub>4</sub>-Carbon Nanofibers Functional Separator for High-Performance Lithium-Sulfur Batteries**

Yongzheng Zhang<sup>a</sup>, Guixin Xu<sup>a</sup>, Qi Kang<sup>b</sup>, Liang Zhan<sup>\*a</sup>, Weiqiang Tang<sup>c</sup>, Yaxin Yu<sup>c</sup>, Kaili Shen<sup>a</sup>, Hucheng Wang<sup>a</sup>, Xuan Chu<sup>a</sup>, Jinyun Wang<sup>a</sup>, Shuangliang Zhao<sup>c</sup>, Yanli Wang<sup>a</sup>, Licheng Ling<sup>\*a</sup> and Shubin Yang<sup>\*d</sup>

<sup>a</sup>State Key Laboratory of Chemical Engineering, Key Laboratory for Specially Functional Polymers and Related Technology of Ministry of Education, Shanghai Key Laboratory of Multiphase Materials Chemical Engineering, East China University of Science and Technology, Shanghai 200237, China

<sup>b</sup>Department of Polymer Science and Engineering, Shanghai Key Laboratory of Electrical Insulation and Thermal Aging, Shanghai Jiao Tong University, Shanghai 200240, PR China

<sup>c</sup>State Key Laboratory of Chemical Engineering and School of Chemical Engineering, East China University of Science and Technology, Shanghai 200237, China.

<sup>d</sup>Key Laboratory of Aerospace Advanced Materials and Performance of Ministry of Education, School of Materials Science and Engineering, Beihang University, Beijing 100191, China

\*Corresponding authors: Liang Zhan, E-mail: zhanliang@ecust.edu.cn; Licheng Ling lchling@ecust.edu.cn; Shubin Yang, E-mail: yangshubin@buaa.edu.cn

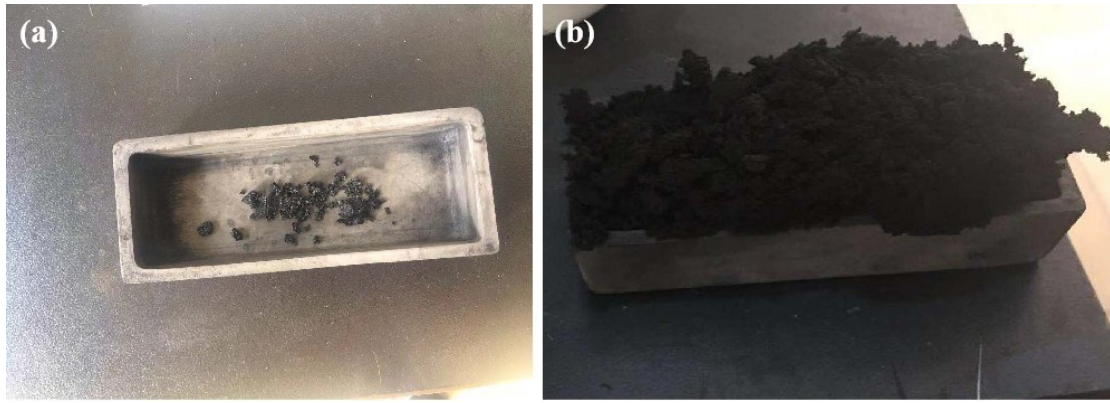

**Figure S1.** Optical images of the sample (a) before and (b) after CVD treatment.

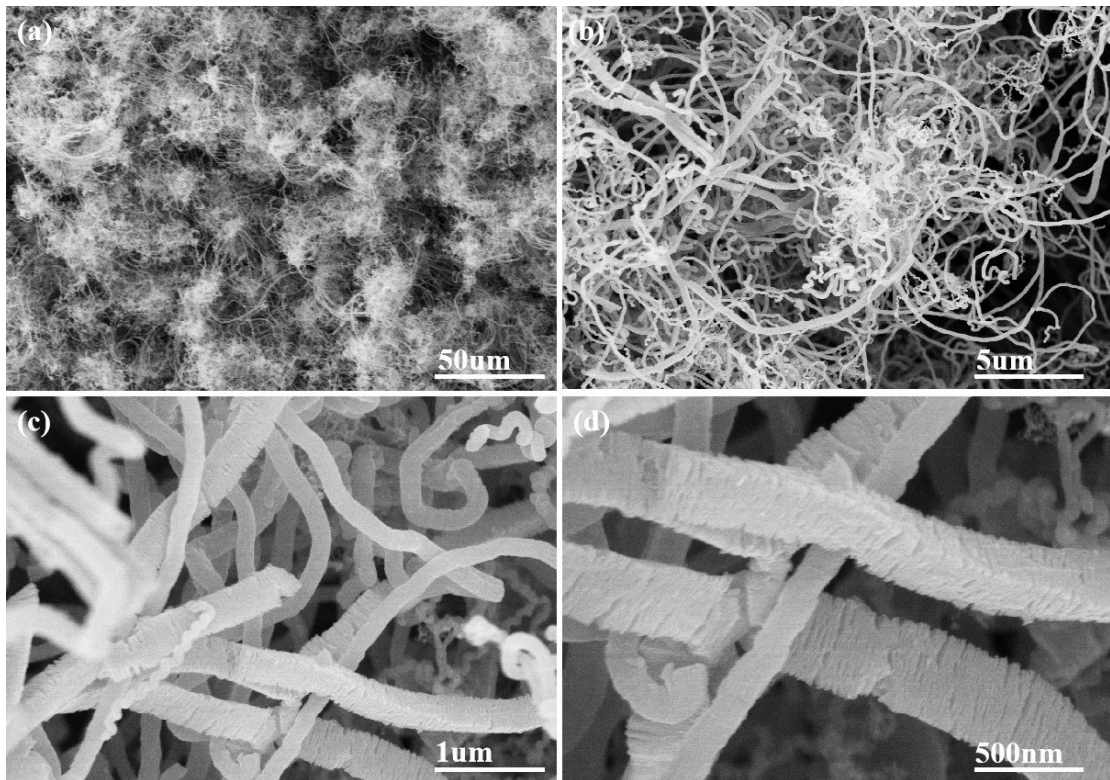

**Figure S2.** SEM images of the defect-rich CNFs

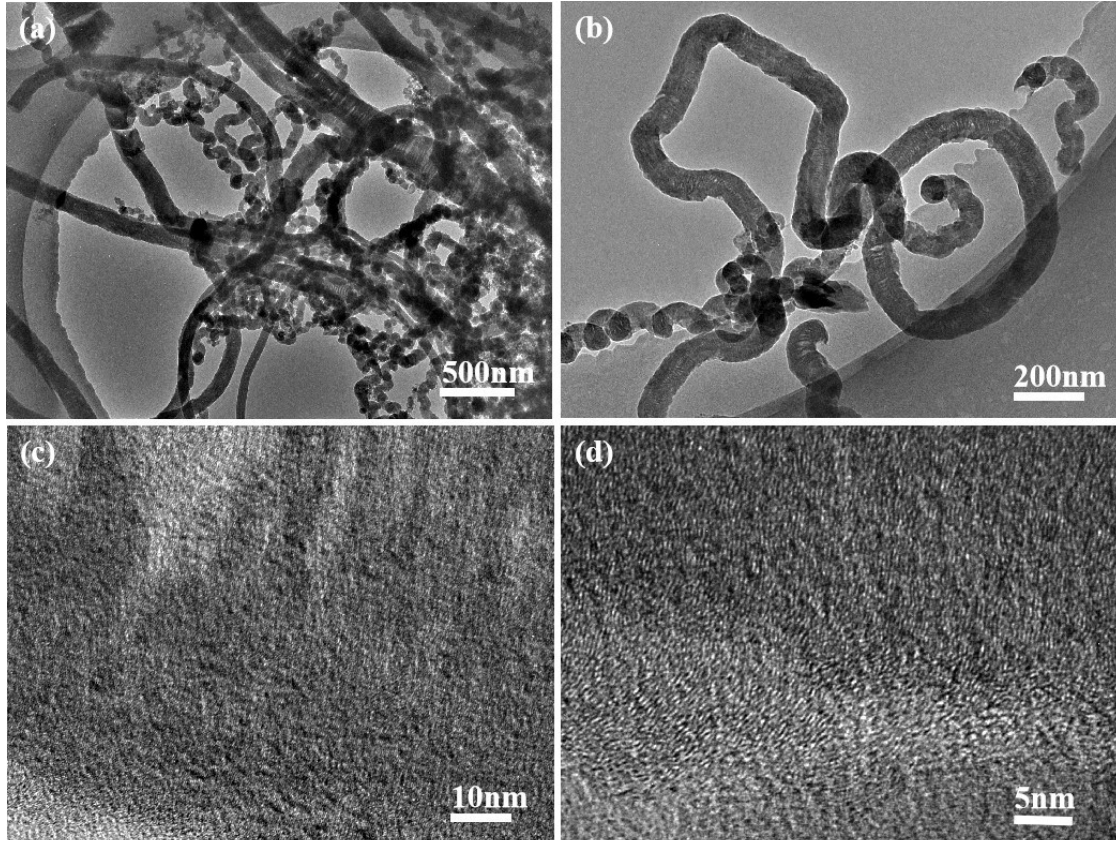

**Figure S3.** (a-b) TEM and (c-d) HRTEM images of the defect-rich CNFs

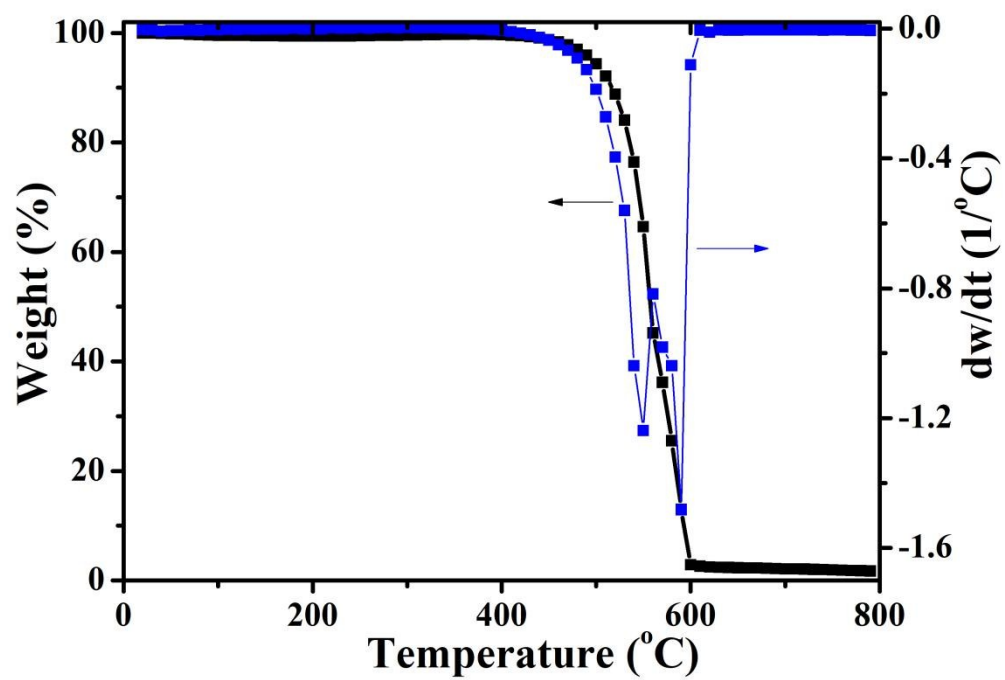

**Figure S4.** TG curve of the defect-rich CNFs thermal-treated at 800 °C in air atmosphere at a heating rate of 10°C/min.

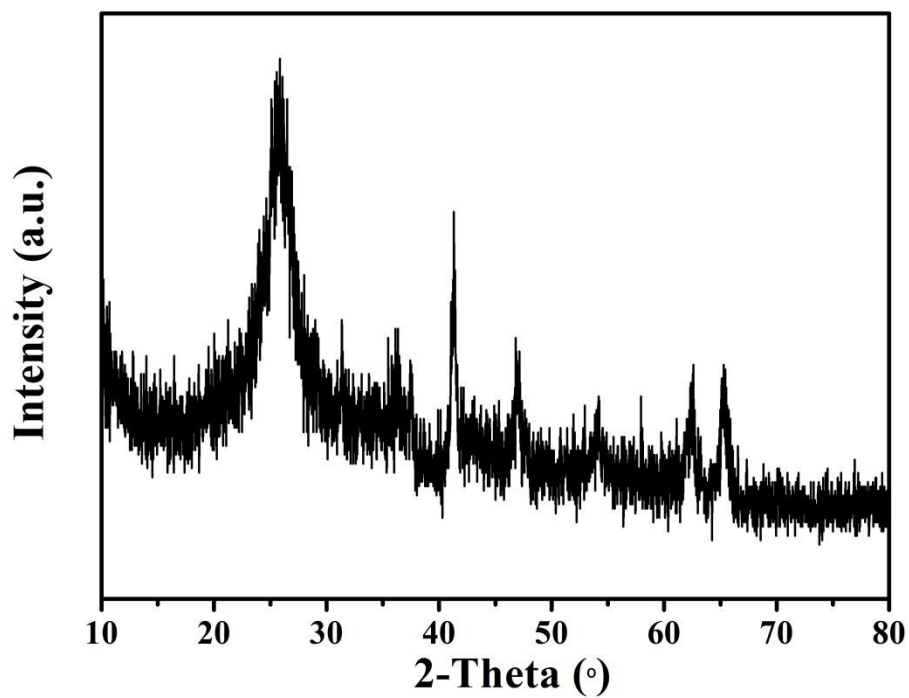

**Figure S5.** XRD pattern of the CNFs-VS<sub>x</sub> hybrid synthesized in water solution

**Table S1.** Comparison of the BET surface area of the CNFs

| Reference | Specific surface area/m <sup>2</sup> g <sup>-1</sup> | Total pore volume/cm <sup>3</sup> g <sup>-1</sup> |
|-----------|------------------------------------------------------|---------------------------------------------------|
| S1        | 20.354                                               | 0.083                                             |
| S2        | 19.95                                                | -                                                 |
| S3        | 249.53                                               | 0.36                                              |
| S4        | 34.9                                                 | -                                                 |
| S5        | 0.32                                                 | -                                                 |
| S6        | 41.9                                                 | 0.17                                              |
| S7        | 25.3-43.8                                            | -                                                 |
| This work | 239                                                  | 0.31                                              |

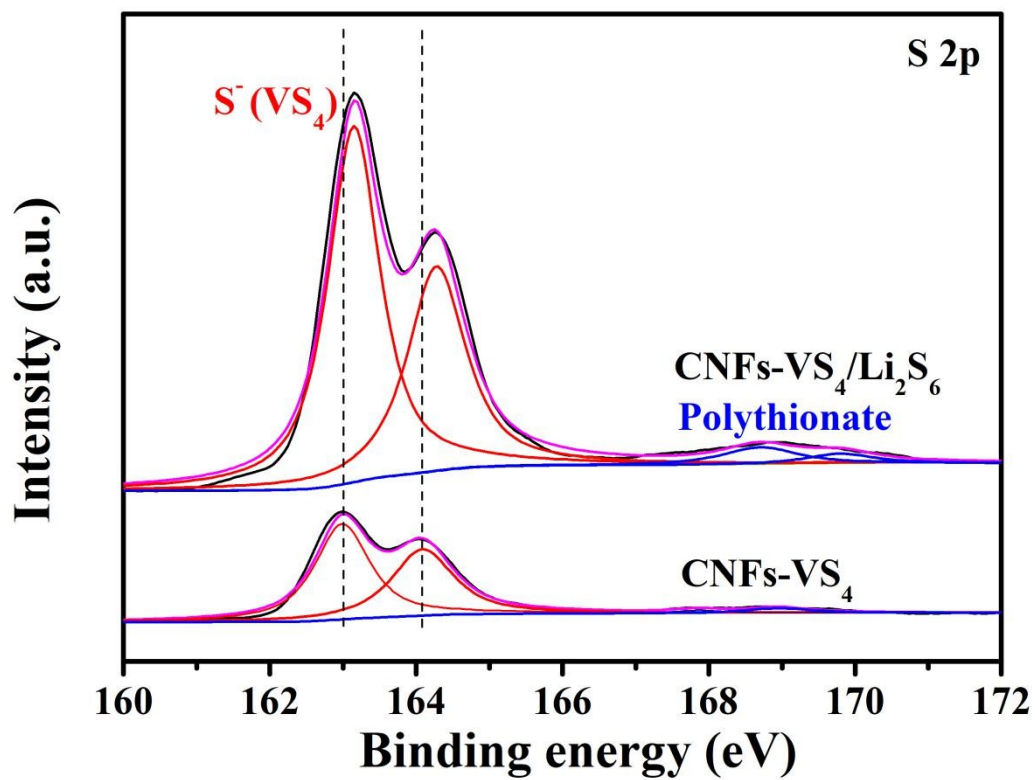

Figure S6. S 2p XPS spectrum of CNFs-VS<sub>4</sub> composite before and after adsorption of Li<sub>2</sub>S<sub>6</sub>.

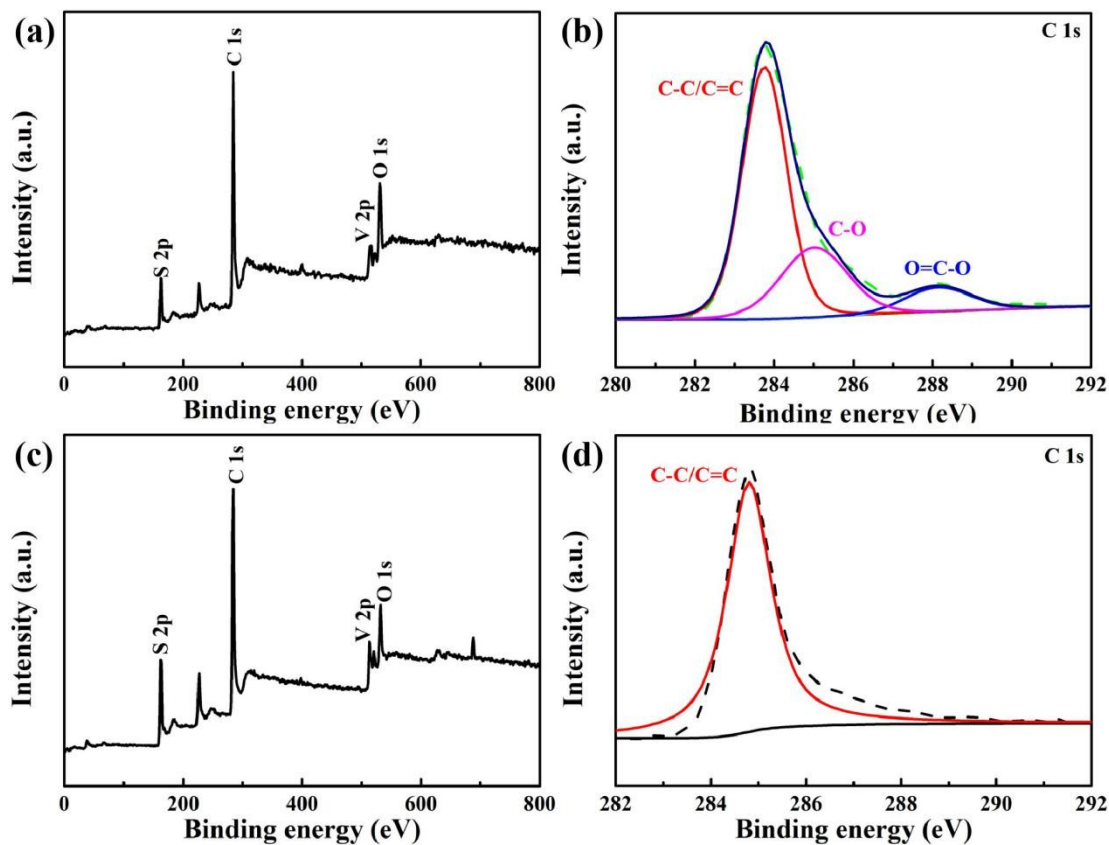

**Figure S7.** (a) XPS spectra and (b) C 1s spectrum of the pristine CNFs- $\text{VS}_4$  hybrids, (c) XPS spectra and (d) C 1s spectrum of CNFs- $\text{VS}_4$  hybrids after adsorption of  $\text{Li}_2\text{S}_6$ .

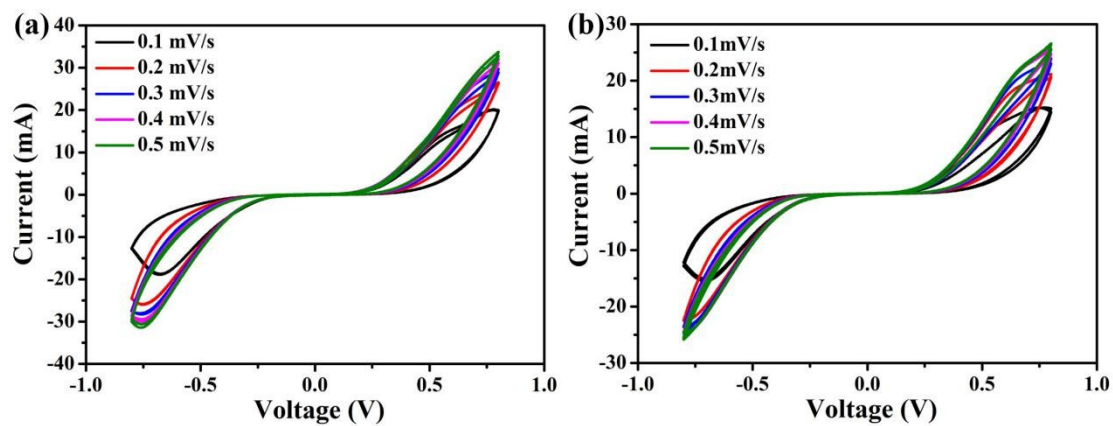

**Figure S8.** CV curves of symmetric dummy cells employing CNFs- $\text{VS}_4$  and CNFs functional separators at various scan rates.

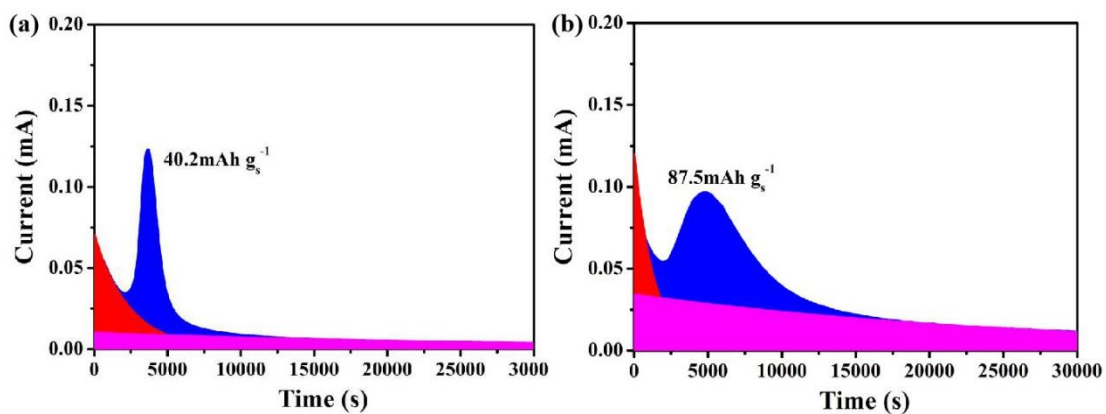

Figure S9. The curve of  $\text{Li}_2\text{S}$  precipitation experiments of CNFs and CNFs- $\text{VS}_4$  electrodes.

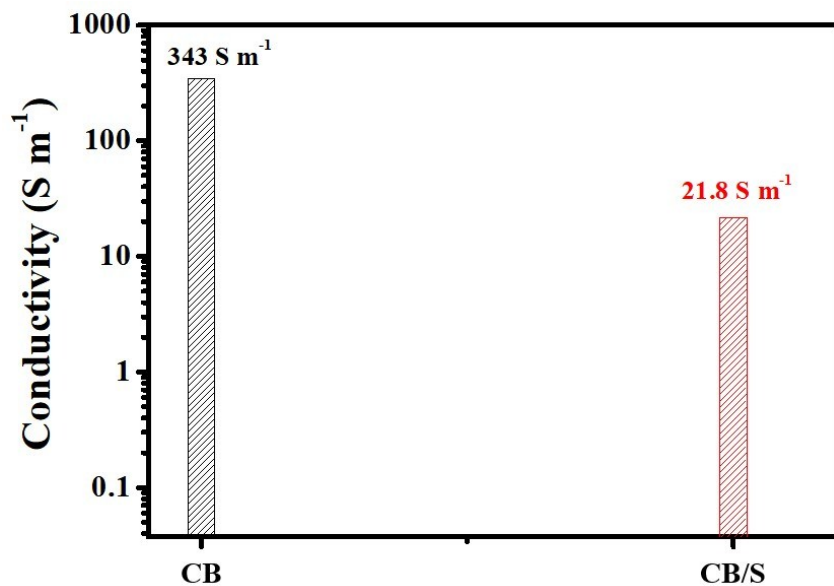

Figure S10. Comparative conductivity of CB and 80wt% CB/S cathode.



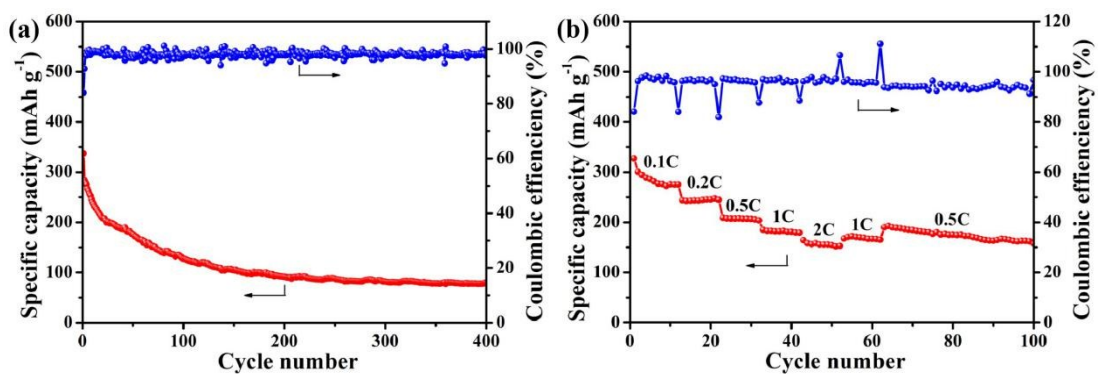

**Figure S11.** (a) Cyclic (at 0.2C) and rate performance of the CB/S cathode based on the pristine separator.

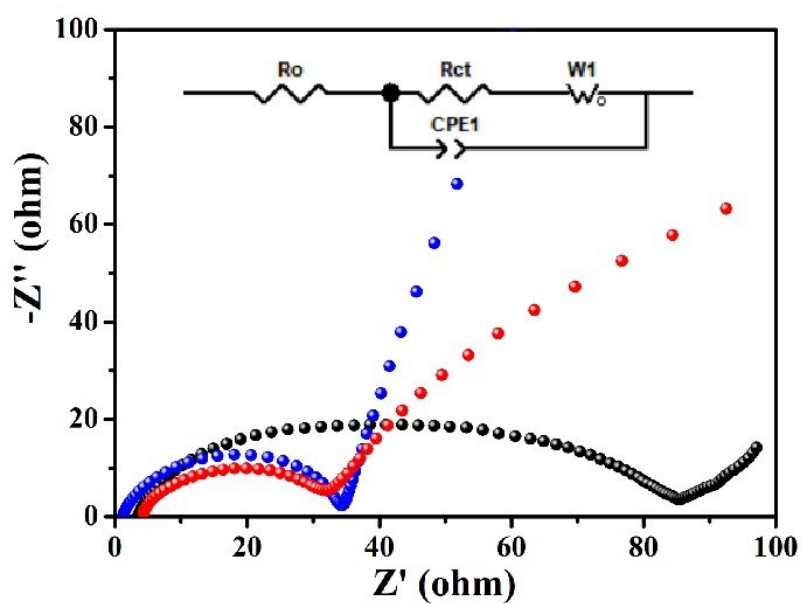

**Figure S12.** EIS curves of the fresh cell with (black) Cathode+PP, (blue) Cathode+CNFs-VS<sub>4</sub> functional separator, (red) Cathode/CNFs-VS<sub>4</sub>+PP.

**Table S2.** The impedance parameters simulated from the equivalent circuit fitting of different cells

| Sample                                            | $R_o(\Omega)$ | $R_{ct}(\Omega)$ |
|---------------------------------------------------|---------------|------------------|
| Cathode+PP                                        | 1.90          | 83.34            |
| Cathode+CNFs-VS <sub>4</sub> functional separator | 1.09          | 33.97            |
| Cathode/CNFs-VS <sub>4</sub> +PP                  | 3.77          | 30.64            |

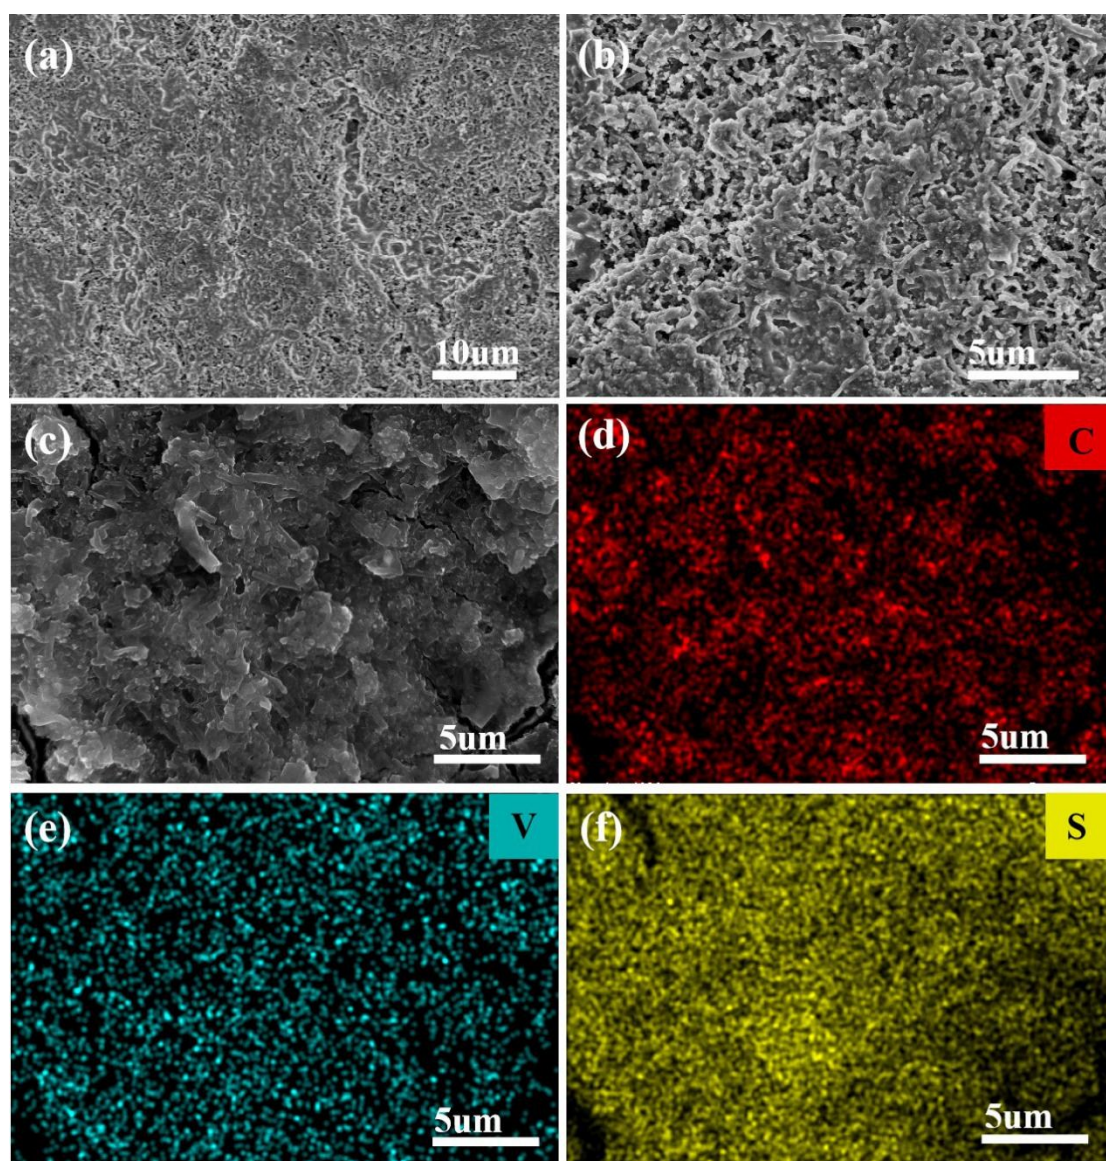

**Figure S13.** (a-c) SEM images and corresponding (d) C, (e) V (f) S elemental mapping images of CNFs-VS<sub>4</sub> functional separator after cycling.

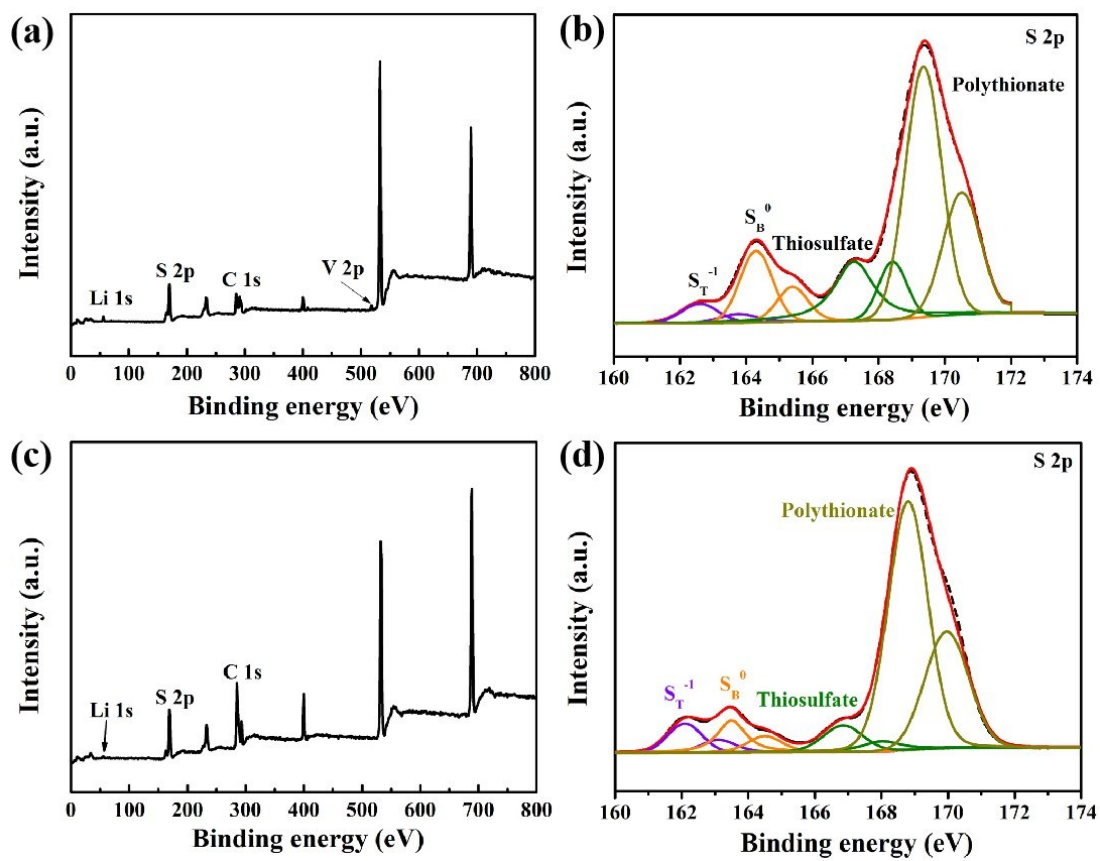

**Figure S14.** (a) XPS spectra and (b) S 2p spectrum of CNFs-VS<sub>4</sub> functional separator after cycling, (c) XPS spectra and (d) S 2p spectrum of CB/S cathode after cycling.

## Reference

- [S1] Y. Li, J. D. Zhu, R. W. Shi, M. Dirican, P. Zhu, C. Y. Yan, H. Jia, J. Zang, J. H. He, X. W. Zhang, *Chem. Eng. J.* 2018, **349**, 376-387.
- [S2] Y. E. Miao, Y. P. Huang, L. S. Zhang, W. Fan, F. L. Lai, T. X. Liu, *Nanoscale*, 2015, **7**, 11093-11101.
- [S3] Z. H. Wang, X. D. Wang, W. Sun, K. N. Sun, *Electrochim. Acta*, 2017, **252**, 127-137.
- [S4] A. Y. Zhang, X. Fang, C. F. Shen, Y. H. Liu, I. G. Seo, Y. Q. Ma, L. Chen, P. Cottingham, C. W. Zhou, *Nano Research*, 2018, **11**, 3340-3352.
- [S5] S. Z. Wang, H. Y. Chen, J. H. Liao, Q. Sun, F. P. Zhao, J. Luo, X. T. Luo, X. B. Niu, M. Q. Wu, R. Y. Li, X. L. Sun, *ACS Energy Lett.* 2019, **4**, 755-762.
- [S6] H. W. Liang, W. J. Zhang, Y. N. Ma, X. Cao, Q. F. Guan, W. P. Xu, S. H. Yu, *ACS Nano*, 2011, **5**, 8148-8161.
- [S7] P. Chen, H. W. Liang, X. H. Lv, H. Z. Zhu, H. B. Yao, S. H. Yu, *ACS Nano*, 2011, **5**, 5928-5935.
